# Supplementary material for: Structure Unveils Relationships between RNA Virus Polymerases
Source: MDPI journal article supplement (doi:10.3390/v13020313), 2021-02-17
Supplement: s1 [file s1]

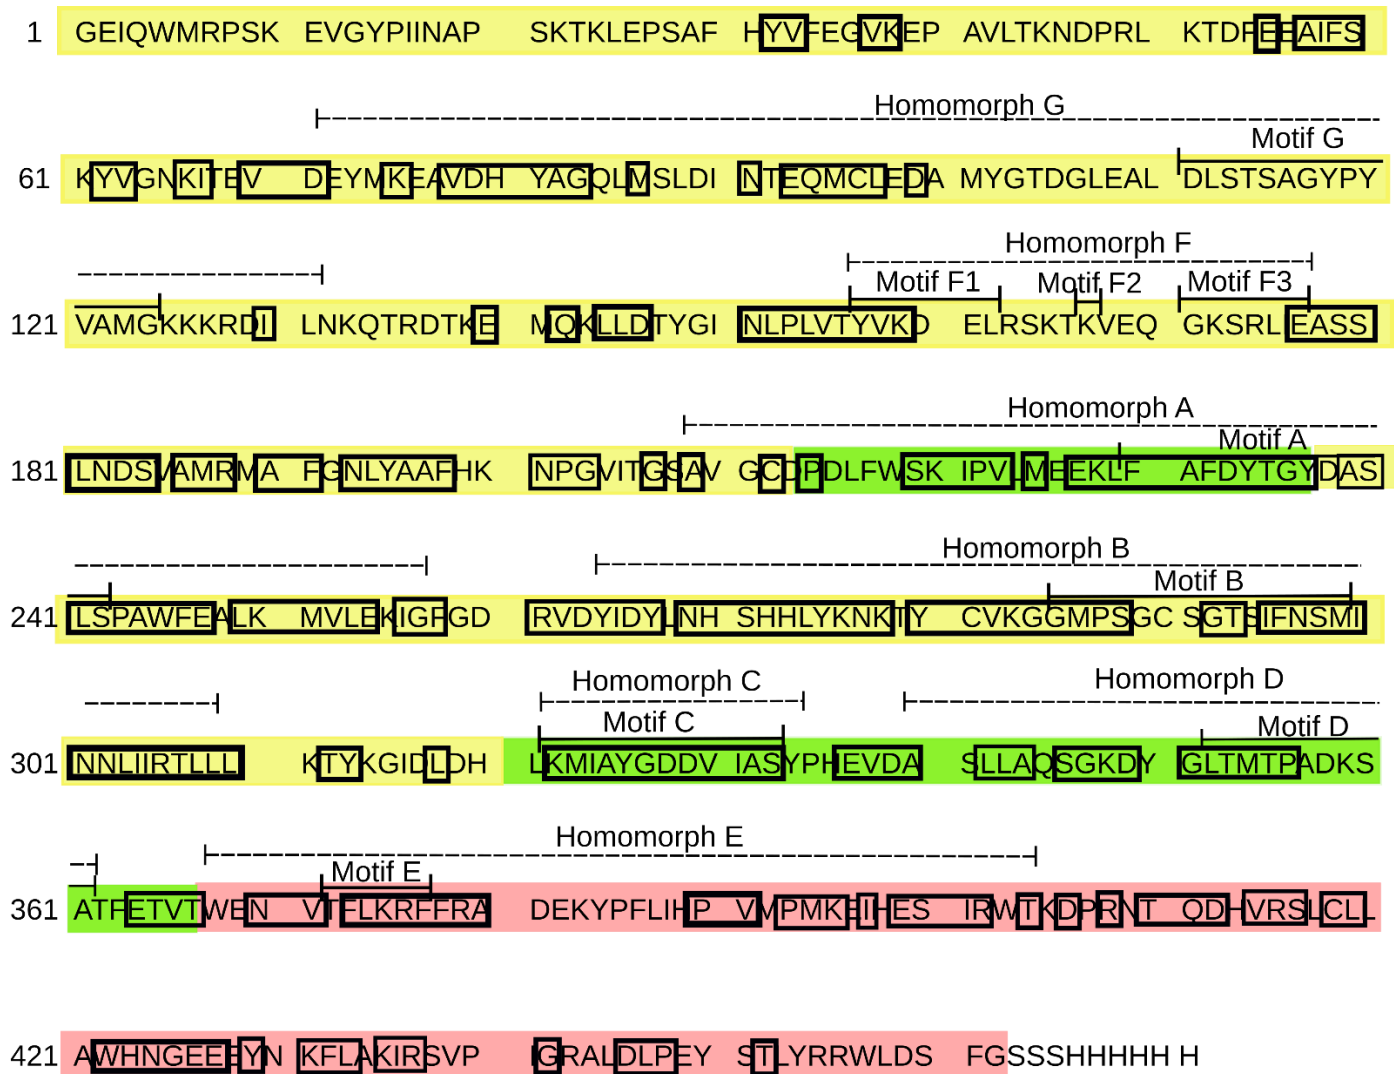

**Supplementary Figure S1.** RdRp subdomains, sequence motifs, homomorphs and structurally equivalent residues mapped on the amino acid sequence of poliovirus RdRp. The structurally equivalent residues comprising the identified RdRp core structure are marked with black squares. The fingers, palm and thumb subdomains of RdRps are marked with yellow, palm and thumb, respectively. The sequence motifs (solid line) and homomorphs (dashed line) are according to Lang et al., 2013 [20]. Supplementary

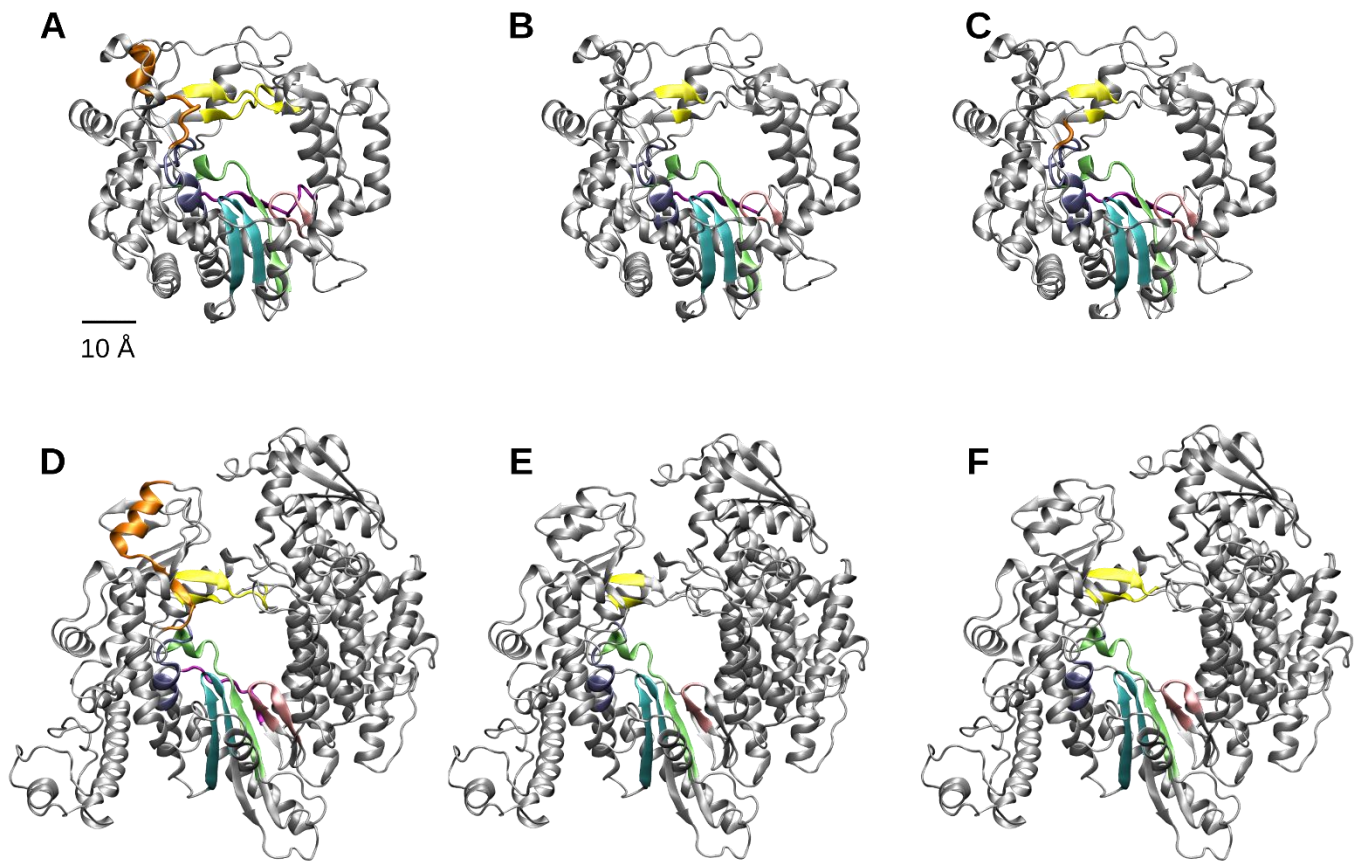

**Supplementary Figure S2.** Coverage of sequence motifs A–G by the structurally equivalent residues in viral RNA-dependent RNA polymerases (RdRps). The motifs are indicated with different colours on the poliovirus (A–C) and vesicular stomatitis Indian virus (D–F) RdRp structures [Protein Data Bank identifier: 3OL6 and 5A22 (residues 35–865 of the chain A), respectively]. (A and C) The full-length motifs A–G. (B and E) The structurally equivalent residues identified for all RdRps in the dataset that overlap with the sequence motifs. (C and F) The structurally equivalent residues identified for Cluster II and Cluster I RdRps, respectively, which overlap with the motifs. The motifs are indicated as motif A: lime, motif B: ice blue, motif C: cyan, motif D: purple, motif E: pink, motif F: yellow and motif G: orange.

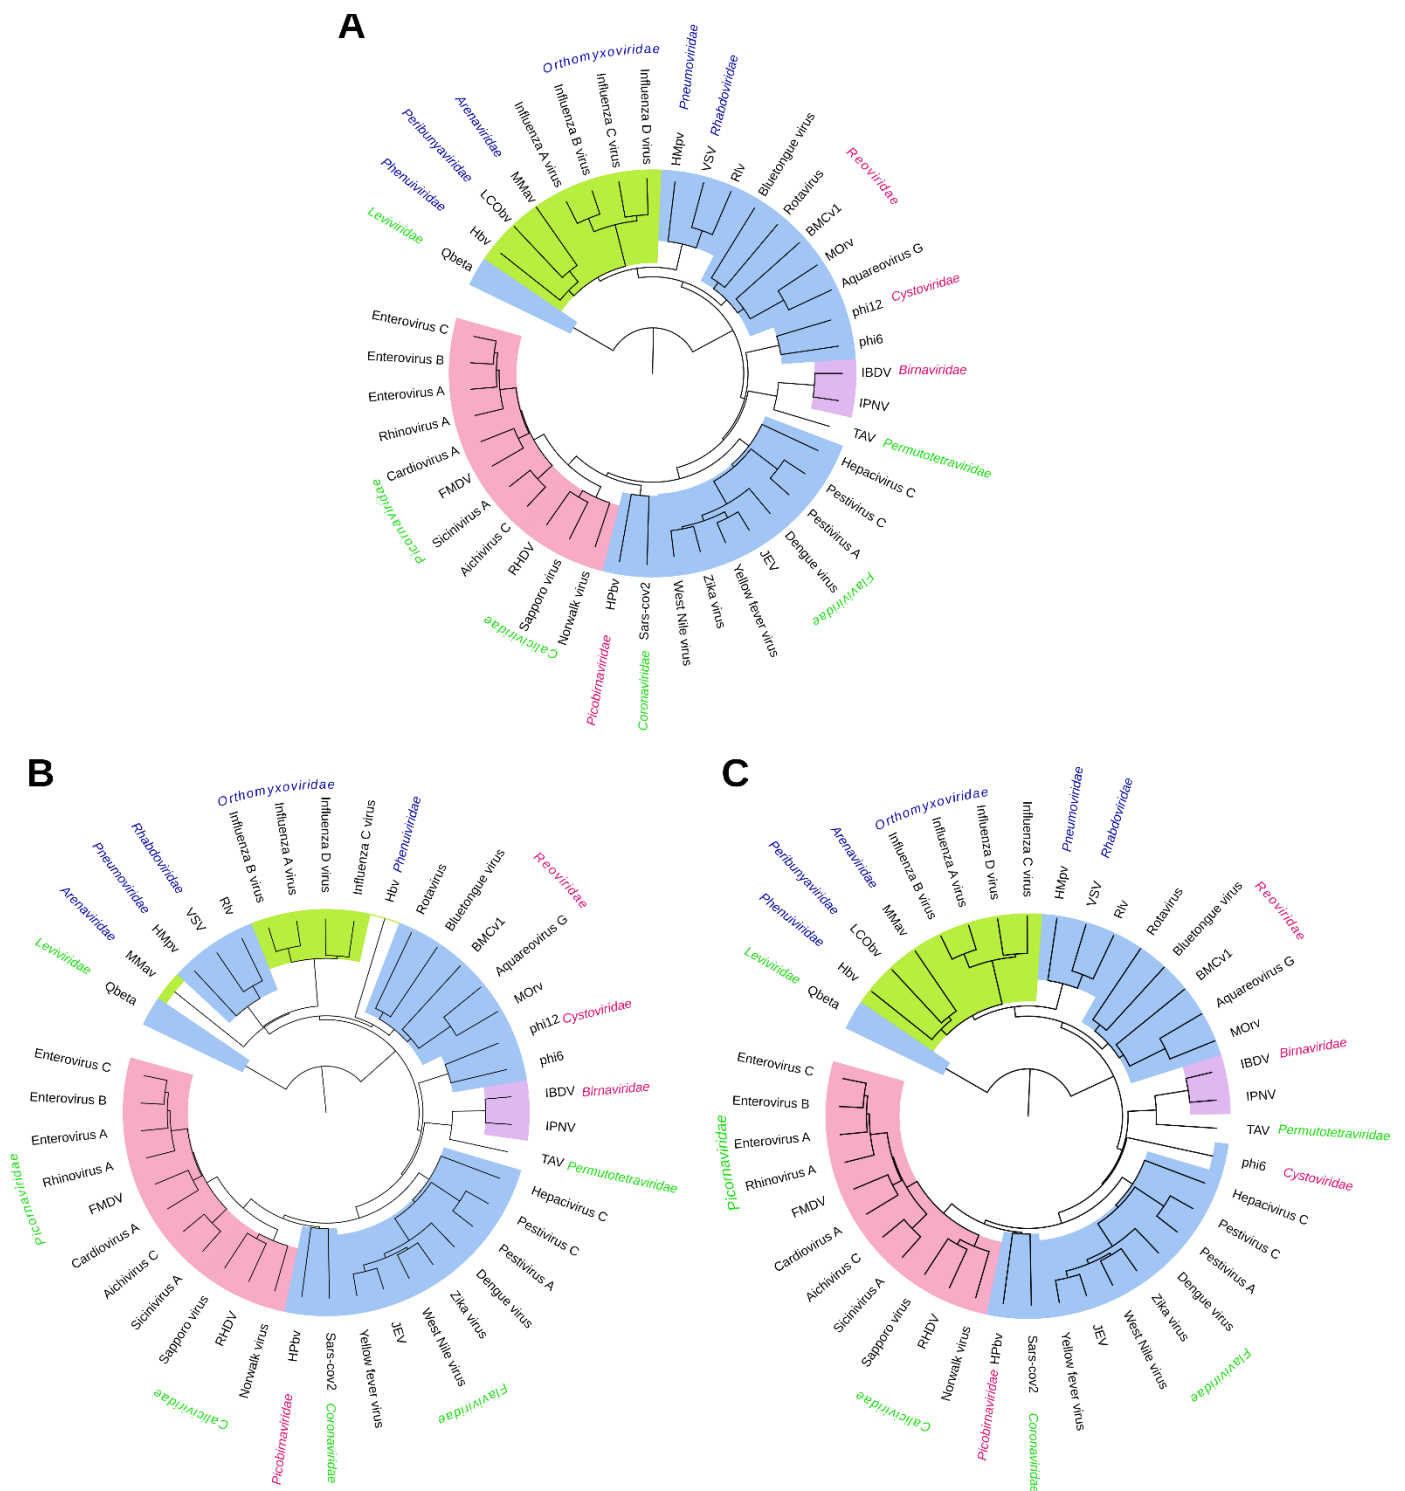

**Supplementary Figure S3.** Consensus and jackknifing trees. A consensus tree (A) that is calculated from all jackknifing trees and jackknifing trees from which either (B) a RdRp from a member of *Peribunyaviridae* family or (C) a member of *Cystoviridae* family are removed. (B) and (C) are the only jackknifing trees which differed from the original tree calculated for the whole dataset (shown in Figure 2) or the jackknifing consensus tree in panel (A). The applied abbreviations are: BMCv2: Bombyx Mori cypovirus 1, FMDV: foot-and-mouth disease virus, Hbv: Huaiyangshan banyangvirus, HPbv: human picobirnavirus, HMpv: human metapneumovirus, IBDV: infectious bursal disease virus, IPNV: infectious pancreatic necrosis virus, JEV: Japanese encephalitis virus, LCObv: La Crosse orthobunyavirus, MMav: Machupo mammarenavirus, MORv: mammalian orthoreovirus, Qbeta: Escherichia phage Qbeta, RHDV: rabbit haemorrhagic disease virus, Rlv: rabies lyssavirus, SARS-cov2: severe acute respiratory syndrome coronavirus 2, TAV: thoscan asigna virus, VSV: vesicular stomatitis Indian virus. The coloring of the family name reflects the nature of the viral genome: green, (+)RNA; blue, (-)RNA; and red, double-stranded RNA. The polymerases using solely primer-independent initiation are indicated with blue background, polymerases dependent on VPg-protein primer with pink background, polymerases applying de novo initiation on (-)strand and self-priming on (+)strand are shown with purple background and polymerases using de novo initiation on (-)strand and RNA-priming on (+)strand synthesis with green background. Background is white if the initiation mechanism is unclear.

Supplementary table S1. The Protein Data Bank (PDB) identifiers, chains, resolutions, lengths in amino acids, and references for protein structures used in the study.

| Genome type         | Family                     | Species                                         | PDBid | Chain | Resolution (Å) | Length in amino acids (according to PDB) | Amino acids in the PDB structure | Reference                                                                                                                                                                                                                                                                                                                                                                  |
|---------------------|----------------------------|-------------------------------------------------|-------|-------|----------------|------------------------------------------|----------------------------------|----------------------------------------------------------------------------------------------------------------------------------------------------------------------------------------------------------------------------------------------------------------------------------------------------------------------------------------------------------------------------|
| Negative-strand RNA | <i>Arenaviridae</i>        | Machupo mammarenavirus                          | 6KLD* | A     | 3.58           | 2209                                     | 1587                             | Peng R, Xu X, Jing J, Wang M, Peng Q, Liu S, Wu Y, Bao X, Wang P, Qi J, Gao GF, Shi Y. Structural insight into arenavirus replication machinery. <i>Nature</i> <b>2020</b> , <i>579</i> , 615-619.                                                                                                                                                                         |
|                     | <i>Orthomyxoviridae</i>    | influenza A virus                               | 4WSB  | B     | 2.65           | 776                                      | 745                              | Reich S, Guilligay D, Pflug A, Malet H, Berger I, Crepin T, Hart D, Lunardi T, Nanao M, Ruigrok RW, et al. Structural insight into cap-snatching and RNA synthesis by influenza polymerase. <i>Nature</i> <b>2014</b> , <i>516</i> , 361-366.                                                                                                                              |
|                     |                            | influenza B virus                               | 4WRT  | B     | 2.7            | 772                                      | 742                              | Reich S, Guilligay D, Pflug A, Malet H, Berger I, Crepin T, Hart D, Lunardi T, Nanao M, Ruigrok RW, et al. Structural insight into cap-snatching and RNA synthesis by influenza polymerase. <i>Nature</i> <b>2014</b> , <i>516</i> , 361-366.                                                                                                                              |
|                     |                            | influenza C virus                               | 5D98* | A     | 3.9            | 754                                      | 711                              | Hengrung N, El Omari K, Serna Martin I, Vreede FT, Cusack S, Rambo RP, Vonrhein C, Bricogne G, Stuart DI, Grimes JM, et al. Crystal structure of the RNA-dependent RNA polymerase from influenza C virus. <i>Nature</i> <b>2015</b> <i>527</i> , 114-117.                                                                                                                  |
|                     |                            | influenza D virus                               | 6KUJ* | A     | 3.4            | 753                                      | 705                              | Peng Q, Liu Y, Peng R, Wang M, Yang W, Song H, Chen Y, Liu S, Han M, Zhang X, et al. Structure of influenza D virus polymerase bound to cRNA promoter in mode A conformation. <i>Nat. Microbiol.</i> <b>2019</b> , <i>4</i> , 1750-1759.                                                                                                                                   |
|                     | <i>Peribunyaviridae</i>    | La Crosse orthobunyavirus                       | 5AMQ  | A     | 3              | 2263                                     | 1666                             | Gerlach P, Malet H, Cusack S, Reguera J. Structural insight into bunyavirus replication and its regulation by Vrna Promoter. <i>Cell</i> <b>2015</b> <i>161</i> , 1267-1279.                                                                                                                                                                                               |
|                     | <i>Phenuiviridae</i>       | Huaiyangshan banyangvirus                       | 6Y6K* | A     | 3.78           | 2084                                     | 1300                             | Vogel D, Thorkelsson SR, Quemin ERJ, Meier K, Kouba T, Gogrefe N, Busch C, Reindl S, Gunther S, Cusack S, et al. Structural and functional characterization of the severe fever with thrombocytopenia syndrome virus L protein. <i>Nucleic Acids Res.</i> <b>2020</b> , <i>48</i> , 5749-5765.                                                                             |
|                     | <i>Pneumoviridae</i>       | human metapneumovirus                           | 6U5O* | L     | 3.7            | 2030                                     | 1354                             | Pan, J., Qian, X., Lattmann, S., El Sahili, A., Yeo, T.H., Jia, H., Cressey, T., Ludeke, B., Noton, S., Kalocsay, M., Fearn, R., Lescar, J. Structure of the human metapneumovirus polymerase phosphoprotein complex. <i>Nature</i> <b>2020</b> , <i>577</i> , 275-279.                                                                                                    |
|                     | <i>Rhabdoviridae</i>       | rabies lyssavirus                               | 6UEB* | A     | 3.3            | 2127                                     | 2099                             | Horwitz JA, Jenni S, Harrison SC, Whelan SPJ. Structure of a rabies virus polymerase complex from electro cryo-microscopy. <i>Proc. Natl. Acad. Sci USA</i> <b>2020</b> , <i>117</i> , 2099-2107.                                                                                                                                                                          |
|                     |                            | vesicular stomatitis Indian virus               | 5A22* | A     | 3.8            | 2109                                     | 2002                             | Liang B, Li Z, Jenni S, Rahmeh AA, Morin BM, Grant T, Grigorieff N, Harrison SC, Whelan SP. Structure of the L protein of vesicular stomatitis virus from electron cryomicroscopy. <i>Cell</i> <b>2015</b> , <i>162</i> , 314.                                                                                                                                             |
| Positive-strand RNA | <i>Caliciviridae</i>       | Norwalk virus                                   | 3BSO  | A     | 1.74           | 510                                      | 482                              | Zamyatkin DF, Parra F, Alonso JM, Harki DA, Peterson BR, Grochulski P, Ng KK. Structural insights into mechanisms of catalysis and inhibition in norwalk virus polymerases. <i>J. Biol. Chem.</i> <b>2008</b> , <i>283</i> , 7705-7712.                                                                                                                                    |
|                     |                            | rabbit haemorrhagic disease virus               | 1KHV  | A     | 2.5            | 516                                      | 493                              | Ng KK, Cherney MM, Vazquez AL, Machin A, Alonso JM, Parra F, James MN. Crystal structures of active and inactive conformations of a caliciviral RNA-dependent RNA polymerase. <i>J. Biol. Chem.</i> <b>2002</b> , <i>277</i> , 1381-1387.                                                                                                                                  |
|                     |                            | Sapporo virus                                   | 2UUT  | A     | 2.4            | 508                                      | 492                              | Fullerton SWB, Robel I, Schuldt L, Gebhardt J, Tucker P, Rohayem J, Gao Y, Yan L, Huang Y, Liu F, Zhao Y, Cao L, Wang T, Sun Q, Ming Z, Zhang L, et al. Structure of the RNA-dependent RNA polymerase from COVID-19 virus. <i>Science</i> <b>2020</b> , <i>368</i> , 779-782.                                                                                              |
|                     | <i>Coronaviridae</i>       | Severe acute respiratory syndrome coronavirus 2 | 7BTF* | A     | 2.95           | 942                                      | 924                              |                                                                                                                                                                                                                                                                                                                                                                            |
|                     | <i>Flaviviridae</i>        | Dengue virus                                    | 3VWS  | A     | 2.1            | 635                                      | 592                              | Noble CG, Lim SP, Chen, YL, Liew, CW, Yap L, Lescar J, Shi P-Y. Conformational flexibility of the Dengue virus RNA-dependent RNA polymerase revealed by a complex with an inhibitor. <i>J. Virol.</i> <b>2013</b> , <i>87</i> , 5291-5295.                                                                                                                                 |
|                     |                            | hepacivirus C                                   | 3TYQ  | A     | 1.6            | 576                                      | 563                              | Chen KX, Lesburg CA, Vibulhan B, Yang W, Chan TY, Venkatraman S, Velazquez F, Zeng Q, Bennett F, Anilkumar GN, et al. A Novel Class of Highly Potent Irreversible Hepatitis C Virus NS5B Polymerase Inhibitors. <i>J. Med. Chem.</i> <b>2012</b> , <i>55</i> , 2089-2101.                                                                                                  |
|                     |                            | Japanese encephalitis virus                     | 4K6M  | A     | 2.6            | 915                                      | 888                              | Lu, G., Gong, P. Crystal Structure of the full-length Japanese encephalitis virus NS5 reveals a conserved methyltransferase-polymerase interface. <i>PLoS Pathog.</i> <b>2013</b> , <i>9</i> , e1003549-e1003549.                                                                                                                                                          |
|                     |                            | pestivirus A                                    | 1S49  | A     | 3              | 609                                      | 576                              | Choi, K.H., Groarke, J.M., Young, D.C., Kuhn, R.J., Smith, J.L., Pevear, D.C., Rossmann, M.G. The structure of the RNA-dependent RNA polymerase from bovine viral diarrhoea virus establishes the role of GTP in de novo initiation. <i>Proc. Natl. Acad. Sci. USA</i> <b>2004</b> , <i>101</i> , 4425-4430.                                                               |
|                     |                            | pestivirus C                                    | 6AE5* | A     | 2.75           | 683                                      | 644                              | Liu W, Shi X, Gong P. A unique intra-molecular fidelity-modulating mechanism identified in a viral RNA-dependent RNA polymerase. <i>Nucleic Acids Res.</i> <b>2018</b> , <i>46</i> , 10840-10854.                                                                                                                                                                          |
|                     |                            | West Nile virus                                 | 2HFZ  | A     | 3              | 639                                      | 608                              | Malet H, Egloff MP, Selisko B, Butcher RE, Wright PJ, Roberts M, Gruez A, Sulzenbacher G, Vonrhein C, Bricogne G, et al. Crystal structure of the RNA polymerase domain of the West Nile virus non-structural protein 5. <i>J. Biol. Chem.</i> <b>2007</b> , <i>282</i> , 10678-10689.                                                                                     |
|                     |                            | Yellow fever virus                              | 6QSN* | A     | 3              | 905                                      | 882                              | Dubankova A, Boura E. Structure of the yellow fever NS5 protein reveals conserved drug targets shared among flaviviruses. <i>Antiviral. Res.</i> <b>2019</b> , <i>169</i> , 104536-104536                                                                                                                                                                                  |
|                     |                            | Zika virus                                      | 5WZ3  | A     | 1.8            | 619                                      | 565                              | Duan W, Song H, Wang H, Chai Y, Su C, Qi J, Shi Y, Gao GF. The crystal structure of Zika virus NS5 reveals conserved drug targets. <i>EMBO J.</i> <b>2017</b> , <i>36</i> , 919-933.                                                                                                                                                                                       |
|                     | <i>Leviviridae</i>         | phage Qβ                                        | 3MMP  | F     | 2.5            | 589                                      | 543                              | Kidmose RT, Vasiliev NN, Chetverin AB, Andersen GR, Knudsen CR. Structure of the Qbeta replicase, an RNA-dependent RNA polymerase consisting of viral and host proteins. <i>Proc. Natl. Acad. Sci. USA</i> <b>2010</b> , <i>107</i> , 10884-10889.                                                                                                                         |
|                     | <i>Permutotetraviridae</i> | thosean asigna virus                            | 5CYR  | A     | 3.5            | 705                                      | 662                              | Ferrero DS, Buxaderas M, Rodriguez JF, Verdager N. The structure of the RNA-dependent RNA polymerase of a permutotetravirus suggests a link between primer-dependent and primer-independent polymerases. <i>PLoS Pathog.</i> <b>2015</b> , <i>11</i> , e1005265-e1005265.                                                                                                  |
|                     | <i>Picornaviridae</i>      | aichivirus                                      | 6R11* | A     | 2.63           | 468                                      | 468                              | Dubankova A, Horova V, Klima M, Boura E. Structures of kobuviral and sicciviral polymerases reveal conserved mechanism of picornaviral polymerase activation. <i>J. Struct. Biol.</i> <b>2019</b> , <i>208</i> , 92-98.                                                                                                                                                    |
|                     |                            | coxsackievirus B3 (enterovirus B)               | 3CDU  | A     | 2.1            | 468                                      | 468                              | Gruez A, Selisko B, Roberts M, Bricogne G, Bussetta C, Jabafi I, Coutard B, De Palma AM, Neyts J, Canard B. The crystal structure of coxsackievirus B3 RNA-dependent RNA polymerase in complex with its protein primer VPg confirms the existence of a second VPg binding site on <i>Picornaviridae</i> polymerases. <i>J. Virol.</i> <b>2008</b> , <i>82</i> , 9577-9590. |
|                     |                            | cardiovirus A                                   | 4NYZ  | A     | 2.15           | 460                                      | 460                              | Vives-Adrian L, Lujan C, Oliva B, van der Linden L, Selisko B, Coutard B, Canard B, van Kuppeveld FJ, Ferrer-Orta C, Verdager N. The crystal structure of a cardiovirus RNA-dependent RNA polymerase reveals an unusual conformation of the polymerase active site. <i>J. Virol.</i> <b>2014</b> , <i>88</i> , 5595-5607.                                                  |
|                     |                            | foot-and-mouth disease virus                    | 1U09  | A     | 1.91           | 476                                      | 476                              | Ferrer-Orta C, Arias A, Perez-Luque R, Escarmis C, Domingo E, Verdager N. Structure of Foot-and-Mouth Disease Virus RNA-dependent RNA Polymerase and Its Complex with a Template-Primer RNA. <i>J. Biol. Chem.</i> <b>2004</b> , <i>279</i> , 47212-47221                                                                                                                  |
|                     |                            | human enterovirus A71 (enterovirus A)           | 3N6M  | A     | 2.5            | 462                                      | 462                              | Wu Y, Lou Z, Miao Y, Yu Y, Dong H, Peng W, Bartlam M, Li X, Rao Z. Structures of EV71 RNA-dependent RNA polymerase in complex with substrate and analogue provide a drug target against the hand-foot-and-mouth disease pandemic in China. <i>Protein Cell</i> <b>2010</b> , <i>1</i> , 491-500.                                                                           |
|                     |                            | Poliovirus 1 (enterovirus C)                    | 3OL6  | A     | 2.5            | 471                                      | 461                              | Gong P, Peersen OB. Structural basis for active site closure by the poliovirus RNA-dependent RNA polymerase. <i>Proc. Natl. Acad. Sci. USA</i> <b>2010</b> , <i>107</i> , 22505-22510.                                                                                                                                                                                     |

|                     |                         |                                     |       |   |      |      |      |                                                                                                                                                                                                                                                                                                     |
|---------------------|-------------------------|-------------------------------------|-------|---|------|------|------|-----------------------------------------------------------------------------------------------------------------------------------------------------------------------------------------------------------------------------------------------------------------------------------------------------|
| Double-stranded RNA |                         | human rhinovirus A                  | 1TP7  | A | 2.4  | 460  | 450  | Appleby TC, Luecke H, Shim JH, Wu JZ, Cheney IW, Zhong W, Vogeley L, Hong Z, Yao N. Crystal structure of complete rhinovirus RNA polymerase suggests front loading of protein primer. <i>J. Virol.</i> <b>2005</b> , <i>79</i> , 277-288.                                                           |
|                     |                         | siccinivirus A                      | 6QWT* | A | 2.3  | 472  | 471  | Dubankova, A., Horova, V., Klima, M., Boura, E. Structures of kobuviral and sicciniviral polymerases reveal conserved mechanism of picornaviral polymerase activation. <i>J. Struct. Biol.</i> <b>2019</b> , <i>208</i> , 92-98.                                                                    |
|                     | <i>Birnaviridae</i>     | infectious bursal disease virus     | 2YI9  | A | 2.2  | 799  | 771  | Garriga D, Navarro A, Querol-Audi J, Abaitua F, Rodriguez JF, Verdaguer N. Activation mechanism of a noncanonical RNA-dependent RNA polymerase. <i>Proc. Natl. Acad. Sci. USA</i> <b>2007</b> , <i>104</i> , 20540-20545.                                                                           |
|                     |                         | infectious pancreatic disease virus | 2PUS  | A | 2.4  | 852  | 765  | Graham SC, Sarin LP, Bahar MW, Myers RA, Stuart DI, Bamford DH, Grimes JM. The N-Terminus of the RNA Polymerase from Infectious Pancreatic Necrosis Virus is the Determinant of Genome Attachment. <i>PLoS Pathog.</i> <b>2011</b> , <i>7</i> , 2085.                                               |
|                     | <i>Cystoviridae</i>     | Pseudomonas phage phi12             | 4GZK  | A | 1.69 | 659  | 650  | Ren Z, C Franklin M, Ghose R. Structure of the RNA-directed RNA Polymerase from the cystovirus 12. <i>Proteins</i> <b>2013</b> , <i>81</i> , 1479-1484.                                                                                                                                             |
|                     |                         | Pseudomonas phage phi6              | 1UVJ  | A | 1.9  | 664  | 664  | Salgado PS, Makeyev EV, Butcher SJ, Bamford DH, Stuart DI, Grimes JM. The structural basis for RNA specificity and Ca2+ inhibition of an RNA-dependent RNA polymerase. <i>Structure</i> <b>2002</b> , <i>12</i> , 307-316.                                                                          |
|                     | <i>Picobirnaviridae</i> | human picobirnavirus                | 5I61  | A | 2.4  | 534  | 505  | Collier AM, Lyytinen OL, Guo YR, Toh Y, Poranen MM, Tao YJ. Initiation of RNA Polymerization and Polymerase Encapsidation by a Small dsRNA Virus. <i>PLoS Pathog.</i> <b>2016</b> , <i>12</i> , e1005523-e1005523.                                                                                  |
|                     | <i>Reoviridae</i>       | aquareovirus G                      | 5ZVS* | A | 3.8  | 1214 | 1060 | Wang X, Zhang F, Su R, Li X, Chen W, Chen Q, Yang T, Wang J, Liu H, Fang Q, et al. Structure of RNA polymerase complex and genome within a dsRNA virus provides insights into the mechanisms of transcription and assembly. <i>Proc. Natl. Acad. Sci. USA</i> <b>2018</b> , <i>115</i> , 7344-7349. |
|                     |                         | bluetongue virus                    | 6PNS* | A | 3.7  | 1302 | 1291 | He Y, Shivakoti S, Ding K, Cui Y, Roy P, Zhou ZH. In situ structures of RNA-dependent RNA polymerase inside bluetongue virus before and after uncoating. <i>Proc. Natl. Acad. Sci. USA</i> <b>2019</b> , <i>116</i> , 16535-16540.                                                                  |
|                     |                         | Bombyx mori cypovirus 1             | 3JB6* | A | 3.3  | 1225 | 1196 | Zhang X, Ding K, Yu X, Chang W, Sun J, Hong Zhou Z. In situ structures of the segmented genome and RNA polymerase complex inside a dsRNA virus. <i>Nature</i> <b>2015</b> , <i>527</i> , 531-534.                                                                                                   |
|                     |                         | mammalian orthoreovirus             | 1MWH  | A | 2.5  | 1267 | 1256 | Tao Y, Farsetta DL, Nibert ML, Harrison SC. RNA Synthesis in a Cage-Structural Studies of Reovirus Polymerase lambda3. <i>Cell</i> <b>2002</b> , <i>111</i> , 733-745.                                                                                                                              |
|                     |                         | rotavirus A                         | 2R7R  | A | 2.6  | 1095 | 1073 | Lu X, McDonald SM, Tortorici MA, Tao YJ, Vasquez-Del Carpio R, Nibert ML, Patton JT, Harrison SC. Mechanism for coordinated RNA packaging and genome replication by rotavirus polymerase VP1. <i>Structure</i> <b>2008</b> , <i>16</i> , 1678-1688.                                                 |

\*Protein structures from virus species not present in Venkataraman, S.; Prasad, B.; Selvarajan, R. RNA dependent RNA polymerases: Insights from structure, function and evolution. *Viruses* **2018**, *10*, 76, doi:10.3390/v10020076 or Jácome, R.; Becerra, A.; Ponce de León, S.; Lazcano, A. Structural analysis of monomeric RNA-dependent polymerases: Evolutionary and therapeutic implications. *PLoS One* **2015**, *10*, e0139001, doi:10.1371/journal.pone.0139001.

**Supplementary Table S2. HSF parameters and applied values**

| Property                                     |                                                  | Weight<br>(Scaled to 100) |
|----------------------------------------------|--------------------------------------------------|---------------------------|
| Geometry                                     | Half sphere exposure (HSE) C $\alpha$ -C $\beta$ | 3.633                     |
|                                              | HSE down                                         | 3.386                     |
|                                              | HSE up                                           | 2.979                     |
|                                              | Dihedral angular $\varphi$                       | 3.211                     |
|                                              | Dihedral angular $\psi$                          | 2.950                     |
|                                              | Distance to center of gravity                    | 1.133                     |
|                                              | Density                                          | 3.488                     |
|                                              | Moment of inertia                                | 1.105                     |
|                                              | Local geometry <sup>1</sup>                      | 22.000                    |
| Secondary structure                          | Secondary structure type                         | 2.572                     |
|                                              | Position in secondary structure                  | 2.921                     |
| Sequence                                     | Amino acid type                                  | 1.409                     |
|                                              | Position in sequence                             | 3.430                     |
| Physicochemical properties of<br>amino acids |                                                  |                           |
|                                              | Hydroxylic                                       | 1.206                     |
|                                              | Hydrophobic                                      | 2.471                     |
|                                              | Aliphatic                                        | 1.395                     |
|                                              | Aromatic                                         | 1.148                     |
|                                              | Charged                                          | 1.410                     |
|                                              | Negative                                         | 1.192                     |
|                                              | Positive                                         | 1.177                     |
|                                              | Polar                                            | 1.991                     |
|                                              | Small                                            | 1.890                     |
|                                              | Tiny                                             | 1.279                     |
|                                              | Turn-like                                        | 2.485                     |
| Variable                                     | C $\alpha$ -C $\alpha$ distance                  | 5.610                     |
|                                              | Backbone direction                               | 1.293                     |
| Other                                        | Local alignment <sup>2</sup>                     | 21.247                    |

<sup>1</sup>Local geometry is defined on a  $\pm 4$  residue-window around a given residue. The similarity is defined as a sum of differences of distance matrices calculated from C $\alpha$ -coordinates of each window within each pair of residues from each compared core.

<sup>2</sup>Dynamic programming module is used to further detect local agreements of the similarities (e.g. improving alignment of helices between cores). The module produces a new reweighted residue similarity matrix from the equivalences according to given parameters (match, mismatch and gap).

Supplementary Table S3. The Ete-compare tool comparison of jackknifing trees

|                                  |                   |              |                  | Ete-compare output  |                                     |                                    |                                                 |                                                              |                                                              |
|----------------------------------|-------------------|--------------|------------------|---------------------|-------------------------------------|------------------------------------|-------------------------------------------------|--------------------------------------------------------------|--------------------------------------------------------------|
| Virus family with omitted member | Omitted structure | Size of core | RMSD (Ångströms) | Effective tree size | Normalized Robinson-Foulds distance | Robinson-Foulds symmetric distance | Maximum Robinson-Foulds value for this distance | Frequency of edges in target tree found in the reference (%) | Frequency of edges in the reference tree found in target (%) |
| <i>Arenaviride</i>               | 6KLD              | 240          | 4.49             | 41                  | 0.00                                | 0.00                               | 78.00                                           | 1.00                                                         | 1.00                                                         |
| <i>Birnaviridae</i>              | 2YI9              | 228          | 4.55             | 41                  | 0.00                                | 0.00                               | 78.00                                           | 1.00                                                         | 1.00                                                         |
| <i>Caliciviridae</i>             | 1KHV              | 231          | 4.56             | 41                  | 0.00                                | 0.00                               | 78.00                                           | 1.00                                                         | 1.00                                                         |
| <i>Coronaviridae</i>             | 7BTF              | 228          | 4.53             | 41                  | 0.00                                | 0.00                               | 78.00                                           | 1.00                                                         | 1.00                                                         |
| <i>Cystoviridae</i>              | 4GZK              | 227          | 4.43             | 41                  | 0.03                                | 2.00                               | 78.00                                           | 0.97                                                         | 0.97                                                         |
| <i>Flaviviridae</i>              | 3VWS              | 234          | 4.54             | 41                  | 0.00                                | 0.00                               | 78.00                                           | 1.00                                                         | 1.00                                                         |
| <i>Leviviridae</i>               | 3MMP              | 230          | 4.45             | 41                  | 0.00                                | 0.00                               | 78.00                                           | 1.00                                                         | 1.00                                                         |
| <i>Orthoviridae</i>              | 5D98              | 230          | 4.5              | 41                  | 0.00                                | 0.00                               | 78.00                                           | 1.00                                                         | 1.00                                                         |
| <i>Peribunyaviridae</i>          | 5AMQ              | 228          | 4.64             | 41                  | 0.10                                | 8.00                               | 78.00                                           | 0.90                                                         | 0.90                                                         |
| <i>Permutotetraviridae</i>       | 5CYR              | 224          | 4.54             | 41                  | 0.00                                | 0.00                               | 78.00                                           | 1.00                                                         | 1.00                                                         |
| <i>Phenuiviridae</i>             | 6Y6K              | 219          | 4.8              | 41                  | 0.00                                | 0.00                               | 78.00                                           | 1.00                                                         | 1.00                                                         |
| <i>Picobirnaviridae</i>          | 5I61              | 227          | 4.5              | 41                  | 0.00                                | 0.00                               | 78.00                                           | 1.00                                                         | 1.00                                                         |
| <i>Picornaviridae</i>            | 4NYZ              | 234          | 4.56             | 41                  | 0.00                                | 0.00                               | 78.00                                           | 1.00                                                         | 1.00                                                         |
| <i>Pneumoviridae</i>             | 6U5O              | 230          | 4.53             | 41                  | 0.00                                | 0.00                               | 78.00                                           | 1.00                                                         | 1.00                                                         |
| <i>Reoviridae</i>                | 3JB6              | 232          | 4.49             | 41                  | 0.00                                | 0.00                               | 78.00                                           | 1.00                                                         | 1.00                                                         |
| <i>Rhabdoviridae</i>             | 5A22              | 228          | 4.46             | 41                  | 0.00                                | 0.00                               | 78.00                                           | 1.00                                                         | 1.00                                                         |
